# Supplementary material for: The Complete Chloroplast Genomes of <em>Bulbophyllum </em>(Orchidaceae) Species: Insight into Genome Structure Divergence and Phylogenetic Analysis
Source: Preprints.org preprint supplement (doi:10.20944/preprints202312.2071.v1), 2023-12-28
Supplement: Supplementary file 1 [file supplementary]

**
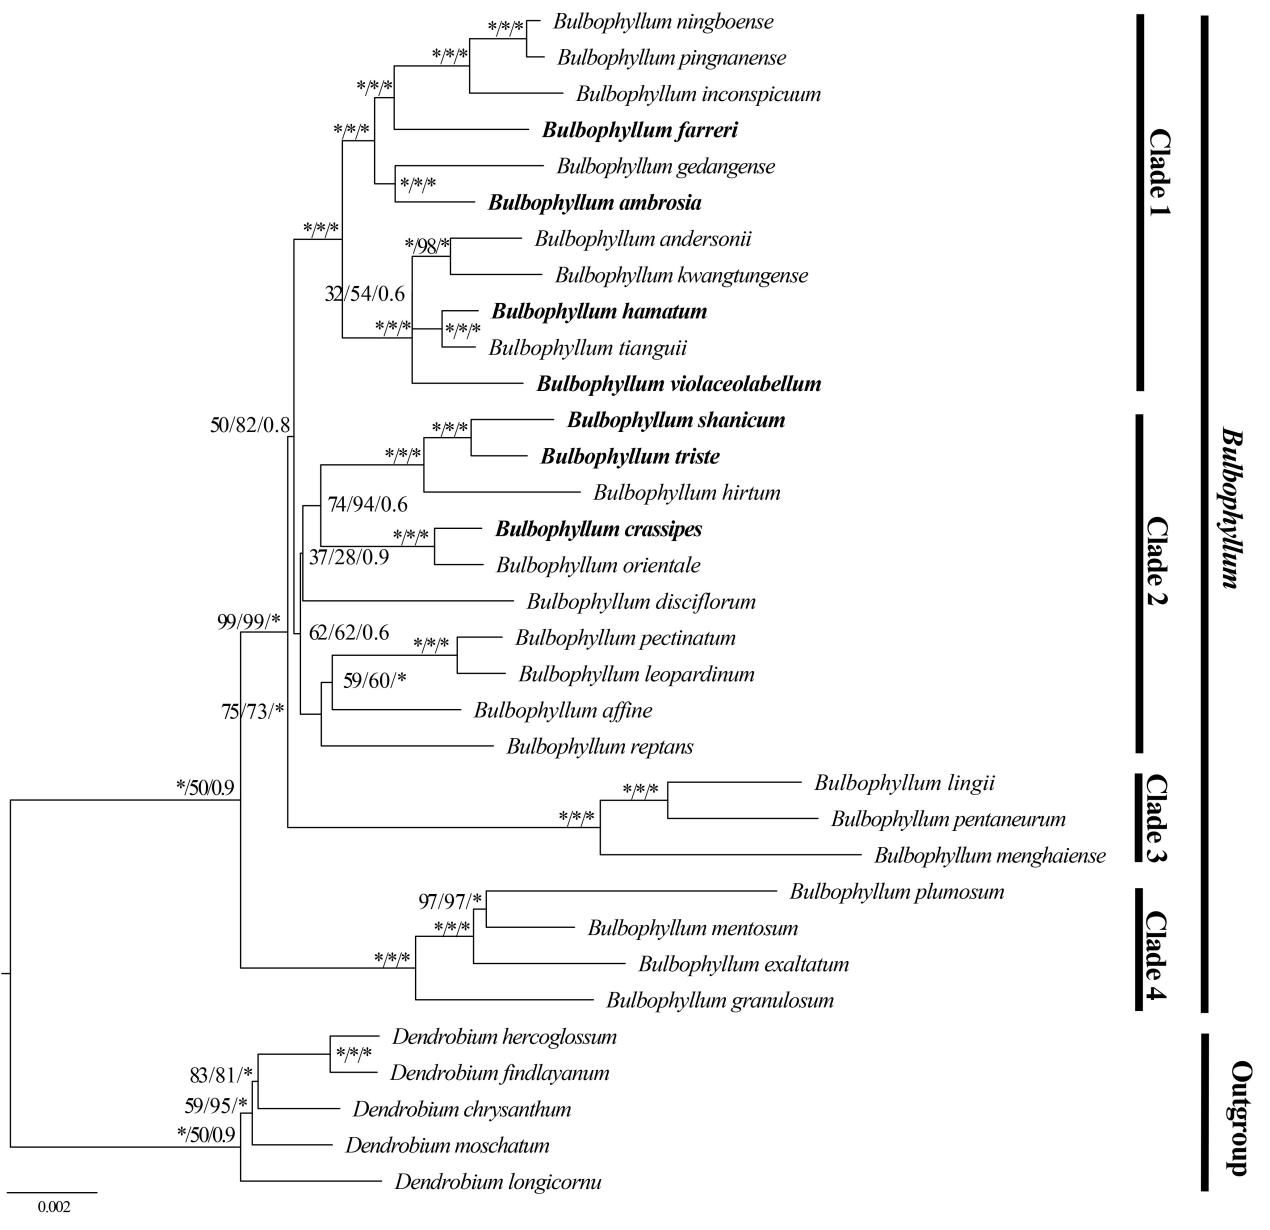
**

**Supplementary** **Figure S1** The phylogenetic tree of 28 *Bulbophyllum* species and five outgroups obtained by maximum-likelihood analysis based on concatenated 68 protein-coding genes. The numbers near the nodes are bootstrap percentages and Bayesian posterior probabilities (BPML, BPMP, PP), *node is 100 bootstrap percentage or 1.00 posterior probability.
